# Supplementary material for: Ice-lithographic fabrication of concave microwells and a microfluidic network
Source: Springer Nature journal article supplement (doi:10.1007/s10544-008-9216-1), 2008-07-31
Supplement: MOESM1 [file 10544_2008_9216_MOESM1_ESM.doc]

**Supplementary Materials**

**Procedure for determining the size distribution profile of the microwells on a substrate.**

One of the original pictures of the microwell pattern taken using a stereoscope (Olympus SZ61, Olympus co., Japan) and a digital camera (Tomoro ACQUCAM Pro, Techsan community co., Korea), is shown in Fig. S1(a). A series of manipulations on this figure using Photoshop 8.0 (Adobe Systems Incorporated, USA) rendered the simplified monochrome figure shown in Fig. S1(b). Using an image analyzing function (‘intensity_area’) embeded in MATLAB 7 (The MathWorks, Inc., USA), a discrete profile of the number of microwells was produced (Fig. S2(a)). Assuming that random condensation of vapor on a substrate follows the Gaussian model, which is frequently used for the normal probability distribution function, a Gaussian fit was generated as seen in Fig. S2(a), resulting in the corresponding graphs (Fig. S2(b)).

**Fig. S1.** A micropatterned substrate (area: 2.7ⅹ2 mm) observed under the stereoscope in (a) color, and (b) black-and-white.


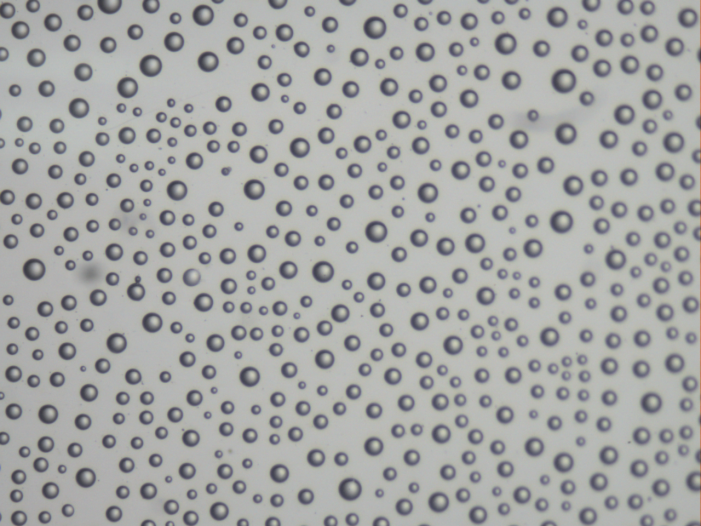

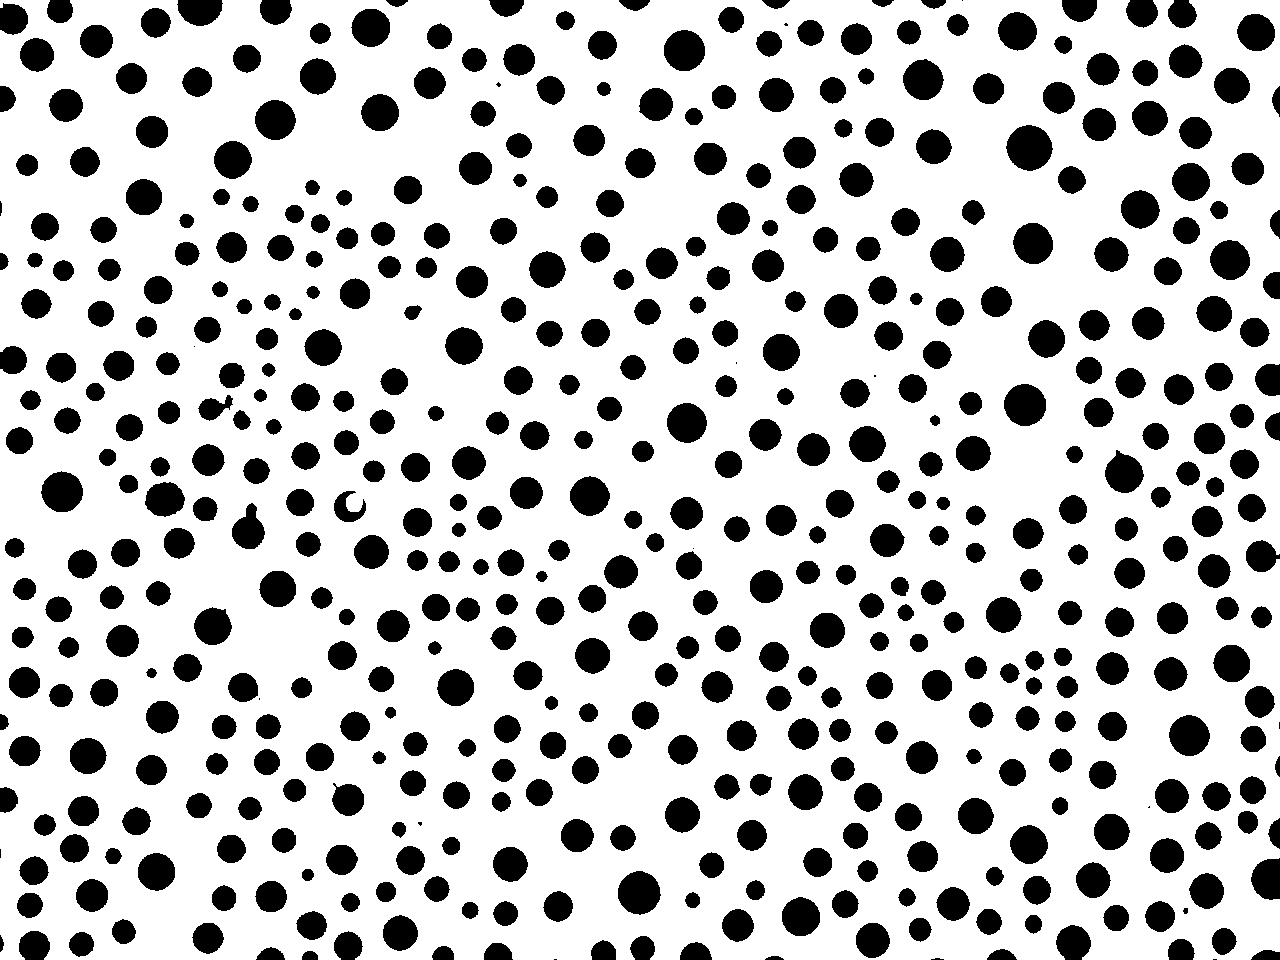


(a) (b)

**Fig. S2.** (a) Discrete data on the distribution of the microwells were obtained using MATLAB and a monochrome image. (b) A Gaussian model was applied to yield smooth graphs.


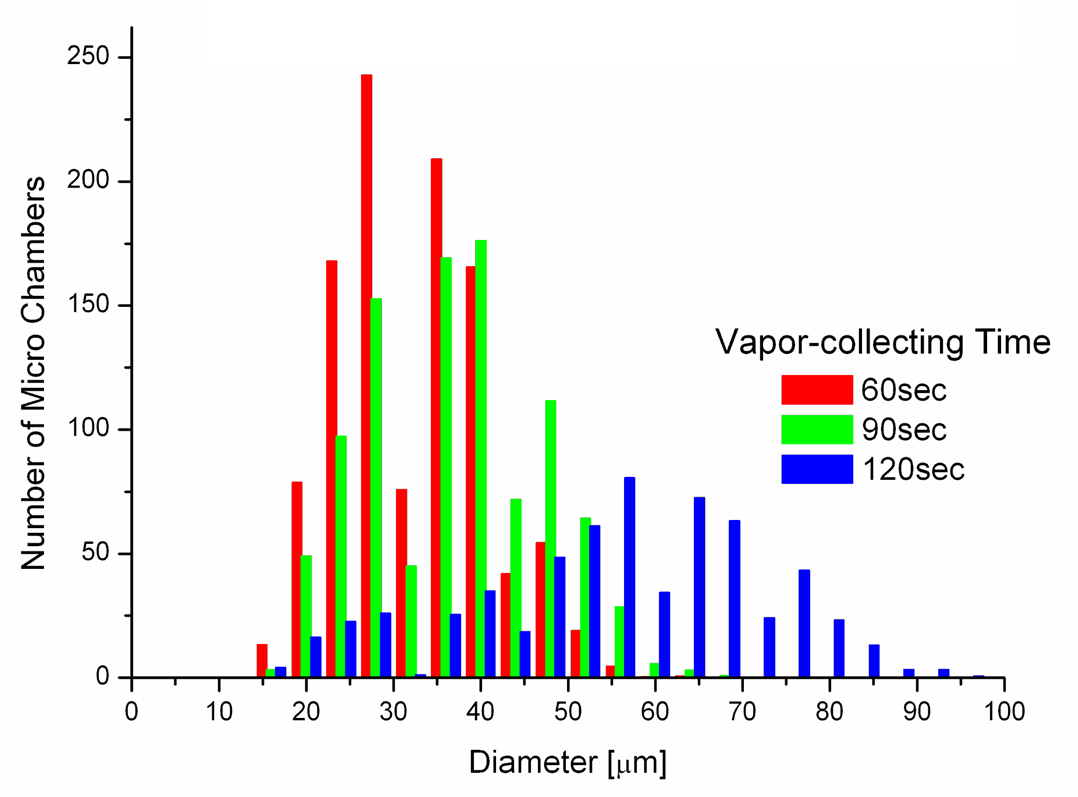

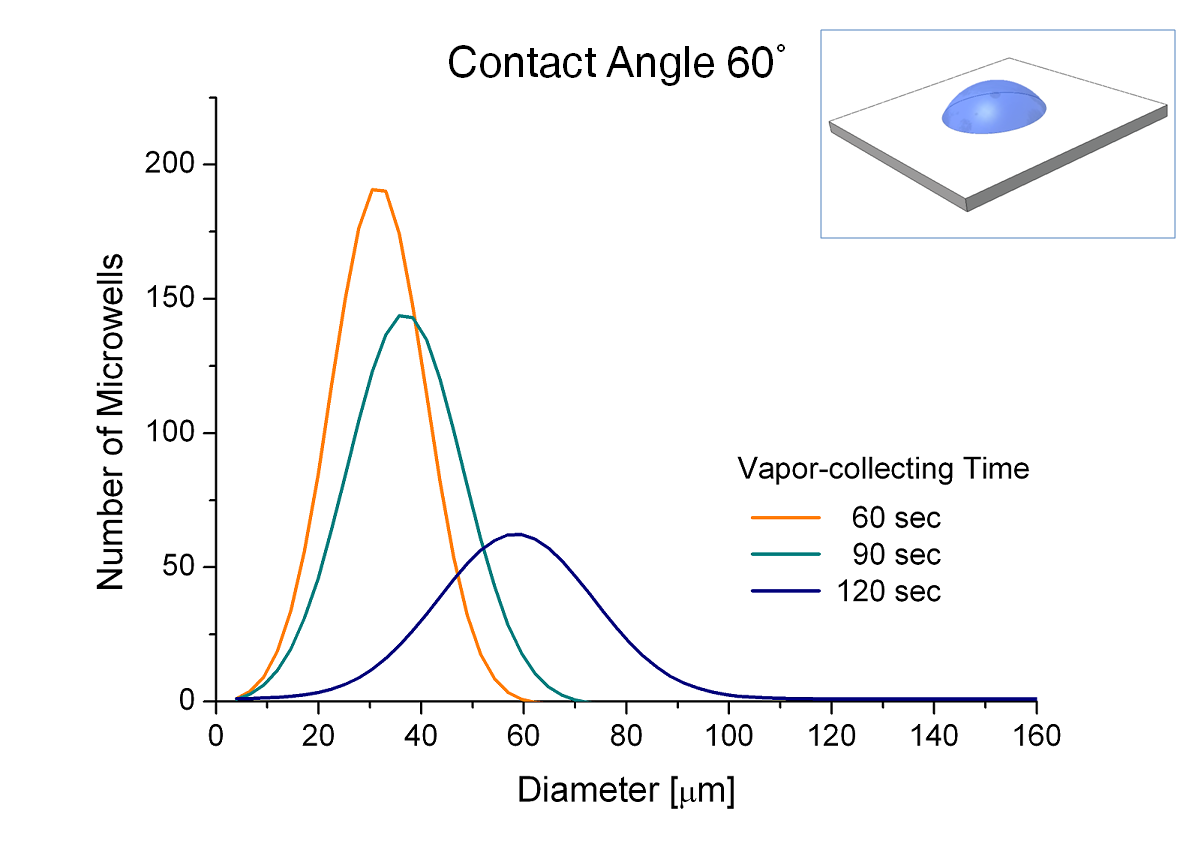


(a) (b)
